# Supplementary material for: Preparation of CeSiO4 from aqueous precursors under soft hydrothermal conditions
Source: Royal Society of Chemistry journal article supplement (doi:10.1039/c9dt01258c), 2019-01-01
Supplement: c9dt01258c1.pdf [file c9dt01258c1.pdf]

# Preparation of CeSiO<sub>4</sub> from aqueous precursors under soft hydrothermal conditions

Paul Estevenon<sup>a,b</sup>, Eleonore Welcomme<sup>a</sup>, Stephanie Szenknect<sup>b</sup>, Adel Mesbah<sup>\*b</sup>, Philippe Moisy<sup>a</sup>, Christophe Poinssot<sup>a</sup>, Nicolas Dacheux<sup>\*b</sup>

<sup>a</sup> CEA, Nuclear Energy Division, CEA Marcoule Research Department of Mining and Fuel Recycling Processes, DMRC, BP 17171, 30207 Bagnols-sur-Cèze, France

<sup>b</sup> ICSM, CEA, CNRS, ENSCM, Univ Montpellier, Site de Marcoule – Bât. 426, BP 17171, 30207 Bagnols-sur-Cèze, France

## SUPPORTING INFORMATION

**Table S1** Synthesis parameters for the presented CeSiO<sub>4</sub> hydrothermal syntheses.

| Label | C <sub>Ce</sub><br>(mol·L <sup>-1</sup> ) | Reactive<br>media | C <sub>carb. tot.</sub><br>(mol·L <sup>-1</sup> ) | pH <sub>initial</sub> | T<br>(°C) | Δt<br>(days) | Final phase                           |                  |
|-------|-------------------------------------------|-------------------|---------------------------------------------------|-----------------------|-----------|--------------|---------------------------------------|------------------|
| (1)   |                                           |                   |                                                   | <b>10.5</b>           |           |              |                                       |                  |
| (2)   |                                           |                   |                                                   | <b>8.7</b>            |           |              |                                       |                  |
| (3)   | 4.2 × 10 <sup>-2</sup>                    | HNO <sub>3</sub>  | ---                                               | <b>6.9</b>            | 250       | 7            | CeO <sub>2</sub>                      |                  |
| (4)   |                                           |                   |                                                   | <b>4.1</b>            |           |              |                                       |                  |
| (5)   |                                           |                   |                                                   | <b>3.9</b>            |           |              |                                       |                  |
| (6)   |                                           |                   |                                                   | <b>2.4</b>            |           |              |                                       |                  |
| ---   |                                           |                   |                                                   | <b>0.10</b>           |           |              |                                       | 8.6              |
| (7)   |                                           |                   |                                                   | <b>0.21</b>           |           |              |                                       | 8.7              |
| (8)   | 0.21                                      | ---               | <b>0.42</b>                                       | 8.6                   | 150       | 10           | CeO <sub>2</sub>                      |                  |
| (9)   |                                           |                   |                                                   | <b>1.0</b>            |           |              |                                       | 8.6              |
| (10)  |                                           |                   |                                                   | <b>2.1</b>            |           |              |                                       | 8.6              |
| (11)  |                                           |                   |                                                   | <b>12.3</b>           |           |              |                                       | CeO <sub>2</sub> |
| (12)  |                                           |                   |                                                   | <b>10.1</b>           |           |              |                                       | CeO <sub>2</sub> |
| (13)  | 0.21                                      | HNO <sub>3</sub>  | ---                                               | <b>9.0</b>            | 150       | 10           | CeSiO <sub>4</sub> + CeO <sub>2</sub> |                  |
| (14)  |                                           |                   |                                                   | <b>8.4</b>            |           |              | CeSiO <sub>4</sub> + CeO <sub>2</sub> |                  |
| (15)  |                                           |                   |                                                   | <b>7.0</b>            |           |              | CeSiO <sub>4</sub> + CeO <sub>2</sub> |                  |

| Label       | $C_{\text{Ce}}$<br>(mol·L <sup>-1</sup> ) | Reactive<br>media      | $C_{\text{carb. tot.}}$<br>(mol·L <sup>-1</sup> ) | pH <sub>initial</sub> | T<br>(°C)  | $\Delta t$<br>(days) | Final phase                                                                                                           |
|-------------|-------------------------------------------|------------------------|---------------------------------------------------|-----------------------|------------|----------------------|-----------------------------------------------------------------------------------------------------------------------|
| (16)        |                                           |                        |                                                   | <b>5.9</b>            |            |                      | CeO <sub>2</sub>                                                                                                      |
| (17)        |                                           |                        |                                                   | <b>3.1</b>            |            |                      | CeO <sub>2</sub>                                                                                                      |
| (18)        |                                           |                        |                                                   | <b>1.3</b>            |            |                      | ---                                                                                                                   |
| (19)        |                                           |                        |                                                   | <b>8.7</b>            |            |                      |                                                                                                                       |
| (20)        |                                           |                        |                                                   | <b>8.6</b>            |            |                      |                                                                                                                       |
| (21)        | 1.0                                       | HNO <sub>3</sub>       | ---                                               | <b>8.2</b>            | 150        | 10                   | CeSiO <sub>4</sub> + CeO <sub>2</sub>                                                                                 |
| (22)        |                                           |                        |                                                   | <b>7.8</b>            |            |                      |                                                                                                                       |
| (23)        |                                           |                        |                                                   | <b>7.4</b>            |            |                      |                                                                                                                       |
| (24)        |                                           |                        |                                                   | <b>7.0</b>            |            |                      |                                                                                                                       |
| (25)        |                                           |                        |                                                   | 7.0                   | <b>90</b>  |                      | CeSiO <sub>4</sub> + CeO <sub>2</sub>                                                                                 |
| (26)        |                                           |                        |                                                   | 7.9                   | <b>130</b> |                      | CeSiO <sub>4</sub> + CeO <sub>2</sub>                                                                                 |
| (27)        | 0.21                                      | HNO <sub>3</sub>       | ---                                               | 7.8                   | <b>170</b> | 10                   | CeO <sub>2</sub>                                                                                                      |
| (28)        |                                           |                        |                                                   | 7.5                   | <b>210</b> |                      | CeO <sub>2</sub>                                                                                                      |
| (29)        |                                           |                        |                                                   | 7.4                   | <b>250</b> |                      | CeO <sub>2</sub>                                                                                                      |
| (30)        | 1.0                                       | HNO <sub>3</sub>       | ---                                               | 8.0                   | <b>40</b>  | 210                  | CeSiO <sub>4</sub> + CeO <sub>2</sub>                                                                                 |
| (31)        |                                           |                        |                                                   | 7.0                   | <b>60</b>  | 52                   | CeSiO <sub>4</sub>                                                                                                    |
| (32)        | 1.0                                       | HCl                    | ---                                               | 8.5                   | 150        | 10                   | CeSiO <sub>4</sub> + CeO <sub>2</sub><br>+ Ce(OH) <sub>2</sub> Cl                                                     |
| (33)        |                                           |                        |                                                   |                       |            |                      |                                                                                                                       |
| ---         |                                           |                        | <b>0.10</b>                                       | 8.8                   |            |                      | Ce <sub>2</sub> O(CO <sub>3</sub> ) <sub>2</sub> + CeO <sub>2</sub>                                                   |
| (34)        |                                           |                        | <b>0.21</b>                                       | 8.7                   |            |                      | Ce <sub>2</sub> O(CO <sub>3</sub> ) <sub>2</sub>                                                                      |
| ---         | 0.21                                      | ---                    | <b>0.42</b>                                       | 8.6                   | 150        | 10                   | Ce <sub>2</sub> O(CO <sub>3</sub> ) <sub>2</sub><br>+ Na <sub>4</sub> Ce <sub>2</sub> (CO <sub>3</sub> ) <sub>5</sub> |
| (35)        |                                           |                        | <b>1.0</b>                                        | 8.6                   |            |                      | Na <sub>4</sub> Ce <sub>2</sub> (CO <sub>3</sub> ) <sub>5</sub>                                                       |
| ---         |                                           |                        | <b>2.1</b>                                        | 8.6                   |            |                      | Na <sub>4</sub> Ce <sub>2</sub> (CO <sub>3</sub> ) <sub>5</sub>                                                       |
| <b>(36)</b> | <b>1.0</b>                                | <b>HNO<sub>3</sub></b> | <b>-</b>                                          | <b>8.0</b>            | <b>150</b> | <b>20</b>            | <b>CeSiO<sub>4</sub></b>                                                                                              |

**Table S2.** Thermodynamic data for the main reactions involving Ce(III), Ce(IV), hydroxide, carbonate and silicate complexes in the considered system at I = 0 (25°C).

| Reaction                                                                                                                    | log K°              |
|-----------------------------------------------------------------------------------------------------------------------------|---------------------|
| $\text{H}_4\text{SiO}_4 \rightleftharpoons \text{H}_2\text{SiO}_4^{2-} + 2 \text{H}^+$                                      | -23.14 <sup>1</sup> |
| $\text{H}_4\text{SiO}_4 \rightleftharpoons \text{H}_3\text{SiO}_4^- + \text{H}^+$                                           | -9.84 <sup>1</sup>  |
| $2 \text{H}_4\text{SiO}_4 \rightleftharpoons \text{Si}_2\text{O}_2(\text{OH})_5^- + \text{H}^+ + \text{H}_2\text{O}$        | -8.50 <sup>1</sup>  |
| $2 \text{H}_4\text{SiO}_4 \rightleftharpoons \text{Si}_2\text{O}_3(\text{OH})_4^{2-} + 2 \text{H}^+ + \text{H}_2\text{O}$   | -19.40 <sup>1</sup> |
| $3 \text{H}_4\text{SiO}_4 \rightleftharpoons \text{Si}_3\text{O}_5(\text{OH})_5^{3-} + 3 \text{H}^+ + 2\text{H}_2\text{O}$  | -29.40 <sup>1</sup> |
| $3 \text{H}_4\text{SiO}_4 \rightleftharpoons \text{Si}_3\text{O}_6(\text{OH})_3^{3-} + 3 \text{H}^+ + 3 \text{H}_2\text{O}$ | -29.30 <sup>1</sup> |
| $4 \text{H}_4\text{SiO}_4 \rightleftharpoons \text{Si}_4\text{O}_6(\text{OH})_6^{2-} + 2 \text{H}^+ + 4 \text{H}_2\text{O}$ | -15.60 <sup>1</sup> |
| $4 \text{H}_4\text{SiO}_4 \rightleftharpoons \text{Si}_4\text{O}_7(\text{OH})_6^{4-} + 4 \text{H}^+ + 3 \text{H}_2\text{O}$ | -39.10 <sup>1</sup> |
| $4 \text{H}_4\text{SiO}_4 \rightleftharpoons \text{Si}_4\text{O}_8(\text{OH})_4^{4-} + 4 \text{H}^+ + 4 \text{H}_2\text{O}$ | -39.20 <sup>1</sup> |
| $6 \text{H}_4\text{SiO}_4 \rightleftharpoons \text{Si}_6\text{O}_{15}^{6-} + 6 \text{H}^+ + 9 \text{H}_2\text{O}$           | -61.80 <sup>1</sup> |
| $\text{CO}_3^{2-} + 2 \text{H}^+ \rightleftharpoons \text{CO}_2 + \text{H}_2\text{O}$                                       | 16.68 <sup>1</sup>  |
| $\text{CO}_3^{2-} + \text{H}^+ \rightleftharpoons \text{HCO}_3^-$                                                           | 10.33 <sup>1</sup>  |
| $\text{Ce}^{3+} + \text{H}_2\text{O} \rightleftharpoons \text{Ce}(\text{OH})^{2+} + \text{H}^+$                             | -8.4 <sup>2</sup>   |
| $\text{Ce}^{3+} + 2 \text{H}_2\text{O} \rightleftharpoons \text{Ce}(\text{OH})_2^+ + 2 \text{H}^+$                          | -17.6 <sup>2</sup>  |
| $\text{Ce}^{3+} + 3 \text{H}_2\text{O} \rightleftharpoons \text{Ce}(\text{OH})_3 + 3 \text{H}^+$                            | -27.2 <sup>2</sup>  |
| $\text{Ce}^{3+} + \text{CO}_3^{2-} \rightleftharpoons \text{CeCO}_3^+$                                                      | 5.4 <sup>3</sup>    |
| $\text{Ce}^{3+} + 2 \text{CO}_3^{2-} \rightleftharpoons \text{Ce}(\text{CO}_3)_2^-$                                         | 9.3 <sup>3</sup>    |
| $\text{Ce}^{3+} + 3 \text{CO}_3^{2-} \rightleftharpoons \text{Ce}(\text{CO}_3)_3^{3-}$                                      | 12.6 <sup>3</sup>   |
| $\text{Ce}^{3+} + 4 \text{CO}_3^{2-} \rightleftharpoons \text{Ce}(\text{CO}_3)_4^{5-}$                                      | 13.7 <sup>3</sup>   |
| $\text{Ce}^{4+} + \text{H}_2\text{O} \rightleftharpoons \text{Ce}(\text{OH})^{3+} + \text{H}^+$                             | 0.76 <sup>2</sup>   |
| $\text{Ce}^{4+} + 2 \text{H}_2\text{O} \rightleftharpoons \text{Ce}(\text{OH})_2^{2+} + 2 \text{H}^+$                       | 0.05 <sup>2</sup>   |
| $\text{Ce}^{4+} + 3 \text{H}_2\text{O} \rightleftharpoons \text{Ce}(\text{OH})_3^+ + 3 \text{H}^+$                          | -1.49 <sup>2</sup>  |
| $\text{Ce}^{4+} + 4 \text{H}_2\text{O} \rightleftharpoons \text{Ce}(\text{OH})_4 + 4 \text{H}^+$                            | -4.12 <sup>2</sup>  |
| $\text{Ce}^{3+} + \text{H}_4\text{SiO}_4 \rightleftharpoons \text{Ce}(\text{OSi}(\text{OH})_3)^{2+} + \text{H}^+$           | -2.0 (this study)   |
| $\text{Ce}^{4+} + \text{H}_4\text{SiO}_4 \rightleftharpoons \text{Ce}(\text{OSi}(\text{OH})_3)^{3+} + \text{H}^+$           | 1.9 (this study)    |

**Table S3** Unit cell parameters determined by Rietveld refinement.

| Conditions | a parameter | c parameter | Volume V |
|------------|-------------|-------------|----------|
|------------|-------------|-------------|----------|

|                                      |             |             |                          |
|--------------------------------------|-------------|-------------|--------------------------|
| <b>Ref.<sup>4</sup></b>              | 6.9564(3) Å | 6.1953(4) Å | 299.80(5) Å <sup>3</sup> |
| Hydrothermal - HNO <sub>3</sub> (36) | 6.9606(1) Å | 6.1951(1) Å | 300.16(1) Å <sup>3</sup> |
| Hydrothermal – HCl (32)              | 6.9480(1) Å | 6.1993(1) Å | 299.27(1) Å <sup>3</sup> |
| 1000°C annealing                     | 6.9446(1) Å | 6.1975(2) Å | 298.89(1) Å <sup>3</sup> |

**Table S4.** Equilibrium constants of M(III)- and M(IV)-hydroxide and silicate complexes at I = 0 (25°C).

| <b>Reaction</b>                                                                                        | <b>log β°</b>            |
|--------------------------------------------------------------------------------------------------------|--------------------------|
| $\text{Eu}^{3+} + \text{HO}^- \rightleftharpoons \text{Eu}(\text{OH})^{2+}$                            | 6.2 <sup>5</sup>         |
| $\text{Eu}^{3+} + \text{H}_3\text{SiO}_4^- \rightleftharpoons \text{Eu}(\text{OSi}(\text{OH})_3)^{2+}$ | 8.04 ± 0.08 <sup>6</sup> |
| $\text{Am}^{3+} + \text{HO}^- \rightleftharpoons \text{Am}(\text{OH})^{2+}$                            | 7.6 ± 0.7 <sup>7</sup>   |
| $\text{Am}^{3+} + \text{H}_3\text{SiO}_4^- \rightleftharpoons \text{Am}(\text{OSi}(\text{OH})_3)^{2+}$ | 8.23 ± 0.09 <sup>6</sup> |
| $\text{Cm}^{3+} + \text{HO}^- \rightleftharpoons \text{Cm}(\text{OH})^{2+}$                            | 6.4 ± 0.1 <sup>7</sup>   |
| $\text{Cm}^{3+} + \text{H}_3\text{SiO}_4^- \rightleftharpoons \text{Cm}(\text{OSi}(\text{OH})_3)^{2+}$ | 7.94 ± 0.06 <sup>6</sup> |
| $\text{Al}^{3+} + \text{HO}^- \rightleftharpoons \text{Al}(\text{OH})^{2+}$                            | 9.05 <sup>1</sup>        |
| $\text{Al}^{3+} + \text{H}_3\text{SiO}_4^- \rightleftharpoons \text{Al}(\text{OSi}(\text{OH})_3)^{2+}$ | 8.73 ± 0.06 <sup>8</sup> |
| $\text{Fe}^{3+} + \text{HO}^- \rightleftharpoons \text{Fe}(\text{OH})^{2+}$                            | 11.81 <sup>1</sup>       |
| $\text{Fe}^{3+} + \text{H}_3\text{SiO}_4^- \rightleftharpoons \text{Fe}(\text{OSi}(\text{OH})_3)^{2+}$ | 9.33 ± 0.26 <sup>9</sup> |
| $\text{Ce}^{3+} + \text{HO}^- \rightleftharpoons \text{Ce}(\text{OH})^{2+}$                            | 5.6 ± 0.1 <sup>2</sup>   |
| $\text{Ce}^{3+} + \text{H}_3\text{SiO}_4^- \rightleftharpoons \text{Ce}(\text{OSi}(\text{OH})_3)^{2+}$ | 7.8 (this study)         |
| $\text{Th}^{4+} + \text{HO}^- \rightleftharpoons \text{Th}(\text{OH})^{3+}$                            | 11.8 ± 0.2 <sup>10</sup> |
| $\text{Th}^{4+} + \text{H}_3\text{SiO}_4^- \rightleftharpoons \text{Th}(\text{OSi}(\text{OH})_3)^{3+}$ | 8.7 – 9.2 <sup>8</sup>   |
| $\text{Np}^{4+} + \text{HO}^- \rightleftharpoons \text{Np}(\text{OH})^{3+}$                            | 14.5 ± 0.2 <sup>10</sup> |
| $\text{Np}^{4+} + \text{H}_3\text{SiO}_4^- \rightleftharpoons \text{Np}(\text{OSi}(\text{OH})_3)^{3+}$ | 11.2 <sup>11</sup>       |
| $\text{Pu}^{4+} + \text{HO}^- \rightleftharpoons \text{Pu}(\text{OH})^{3+}$                            | 14.6 ± 0.2 <sup>10</sup> |
| $\text{Pu}^{4+} + \text{H}_3\text{SiO}_4^- \rightleftharpoons \text{Pu}(\text{OSi}(\text{OH})_3)^{3+}$ | 11.8 <sup>11</sup>       |
| $\text{Ce}^{4+} + \text{HO}^- \rightleftharpoons \text{Ce}(\text{OH})^{3+}$                            | 14.8 <sup>2</sup>        |
| $\text{Ce}^{4+} + \text{H}_3\text{SiO}_4^- \rightleftharpoons \text{Ce}(\text{OSi}(\text{OH})_3)^{3+}$ | 11.7 (this study)        |

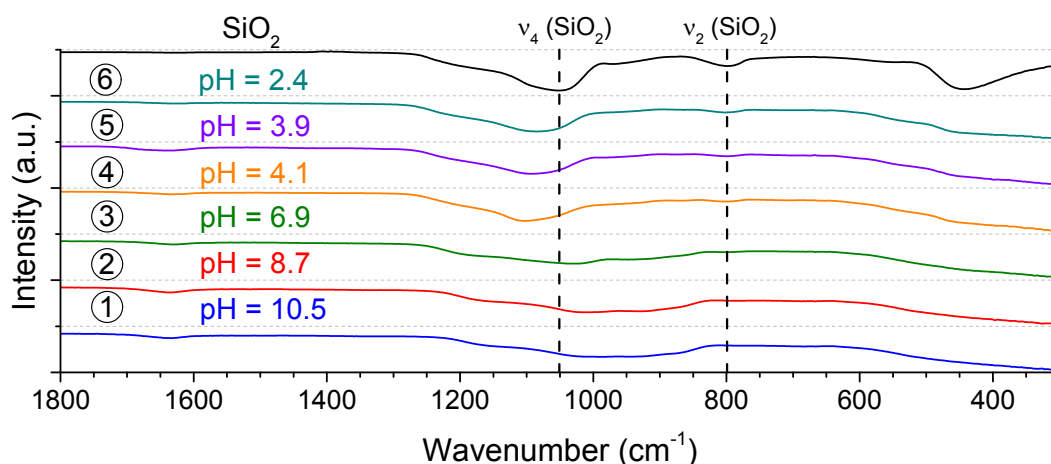

**Figure S1** Infrared spectra obtained for samples prepared under hydrothermal conditions (7 days,  $T = 250^{\circ}\text{C}$ ) with starting silicate and cerium(IV) concentrations of  $4.2 \times 10^{-2} \text{ mol}\cdot\text{L}^{-1}$  and initial pH value equal to 10.5 (1), 8.7 (2), 6.9 (3), 4.1 (4), 3.9 (5) and 2.4 (6).

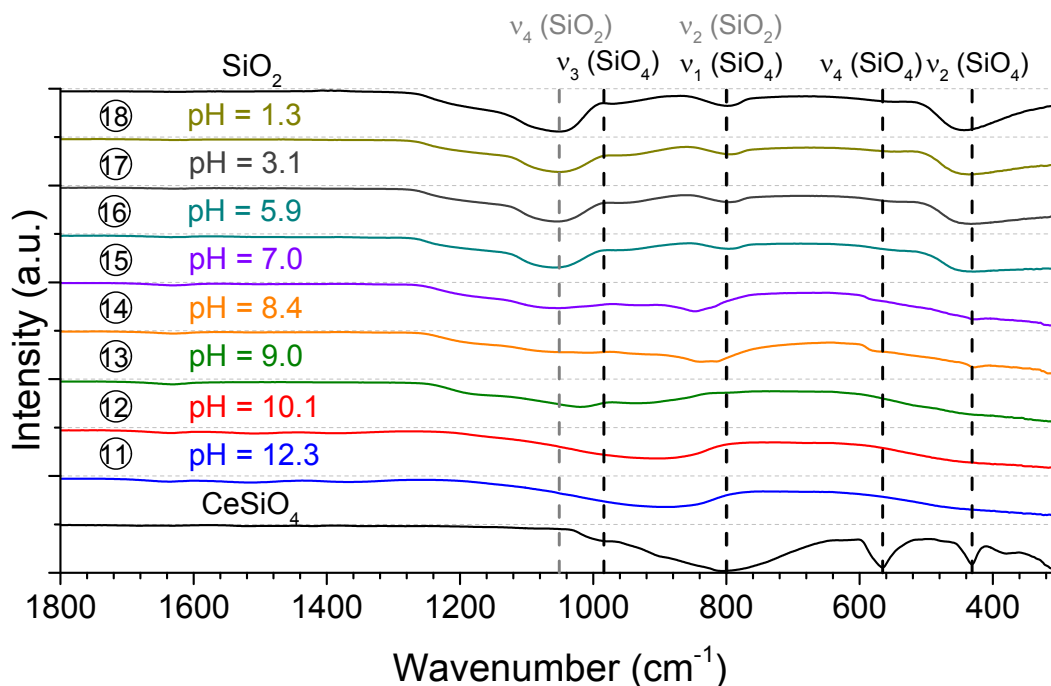

**Figure S2** IR obtained for samples prepared under hydrothermal conditions (10 days,  $T = 150^{\circ}\text{C}$ ) with starting silicate and cerium(III) concentrations of  $0.21 \text{ mol}\cdot\text{L}^{-1}$ , in nitric acid media and with an initial pH equal to 12.3 (11), 10.1 (12), 9.0 (13), 8.4 (14), 7.0 (15), 5.9 (16), 3.1 (17) or 1.3 (18).

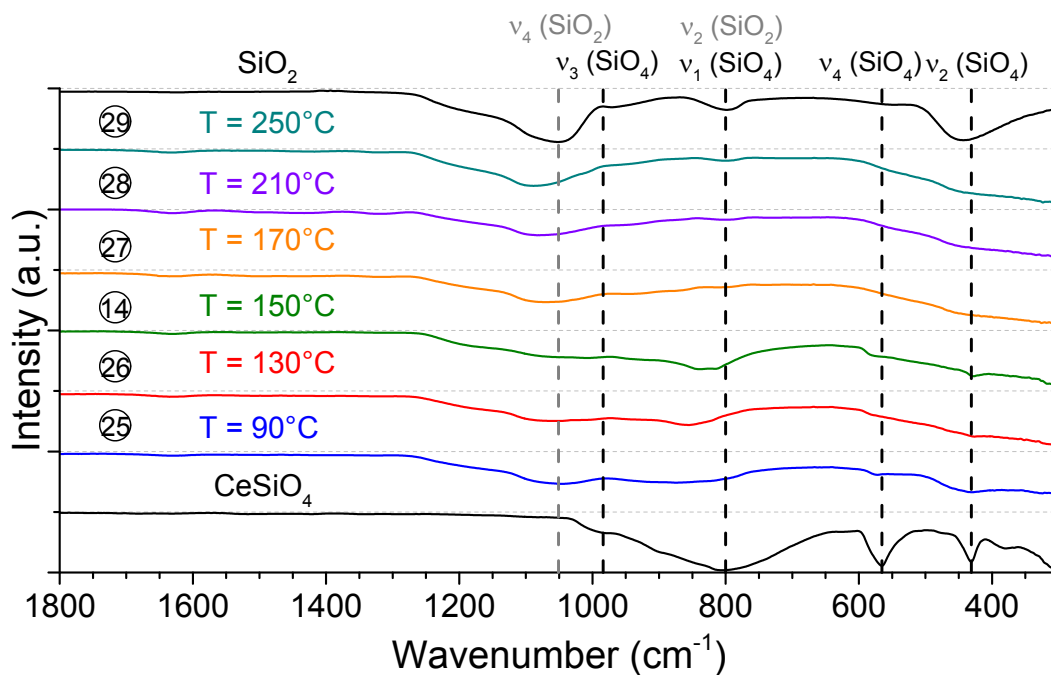

**Figure S3** IR obtained for samples prepared with starting silicate and cerium(III) concentrations of 0.21 mol·L<sup>-1</sup>, in nitric acid media and with an initial pH ranging from 7 to 8, after hydrothermal treatment during 10 days at 90°C (25), 130°C (26), 150°C (27), 170°C (28) and 250°C (29).

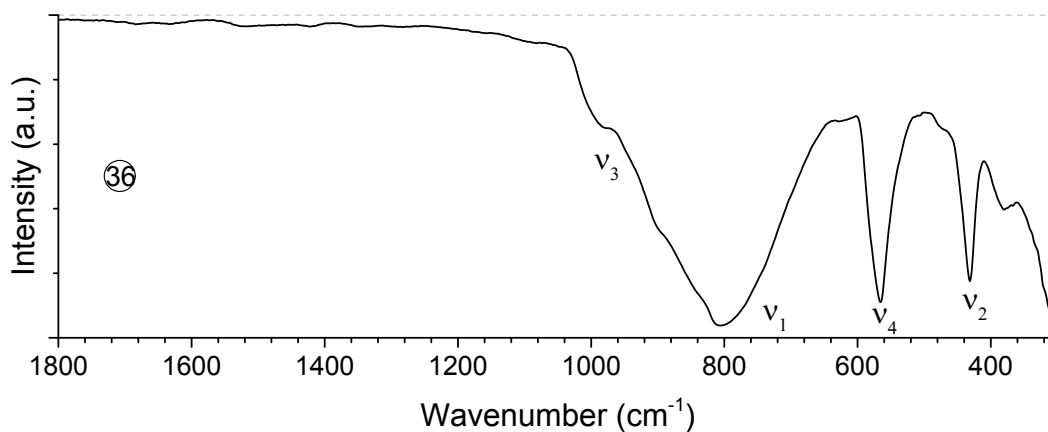

**Figure S4** IR spectrum obtained for CeSiO<sub>4</sub> prepared under hydrothermal conditions (T = 150°C, t = 20 days, Ar-atmosphere), in nitric medium, with C<sub>Ce(III)</sub> ≈ C<sub>Si</sub> ≈ 1 mol·L<sup>-1</sup> and pH<sub>initial</sub> = 8.0 (36).

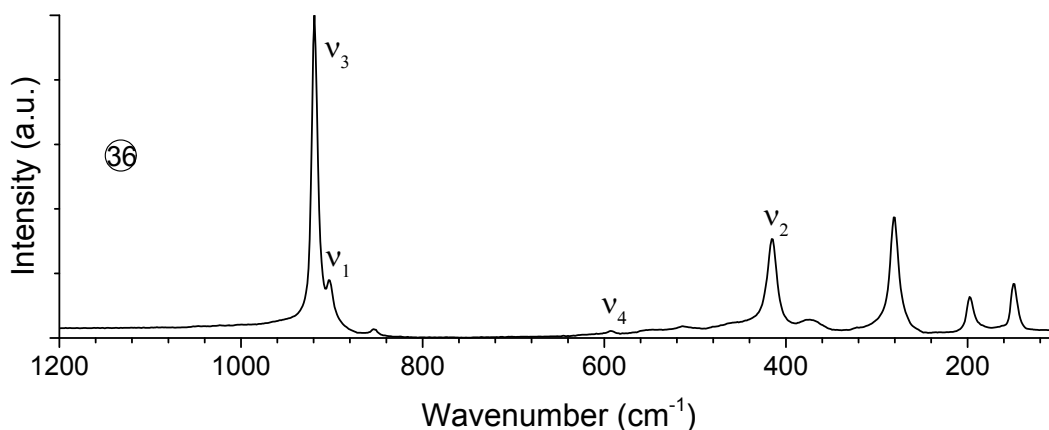

**Figure S5** Raman spectrum recorded for  $\text{CeSiO}_4$  prepared under hydrothermal conditions ( $T = 150^\circ\text{C}$ ,  $t = 20$  days, Ar-atmosphere), in nitric medium, with  $C_{\text{Ce(III)}} \approx C_{\text{Si}} \approx 1 \text{ mol}\cdot\text{L}^{-1}$  and  $\text{pH}_{\text{initial}} = 8.0$  (36).

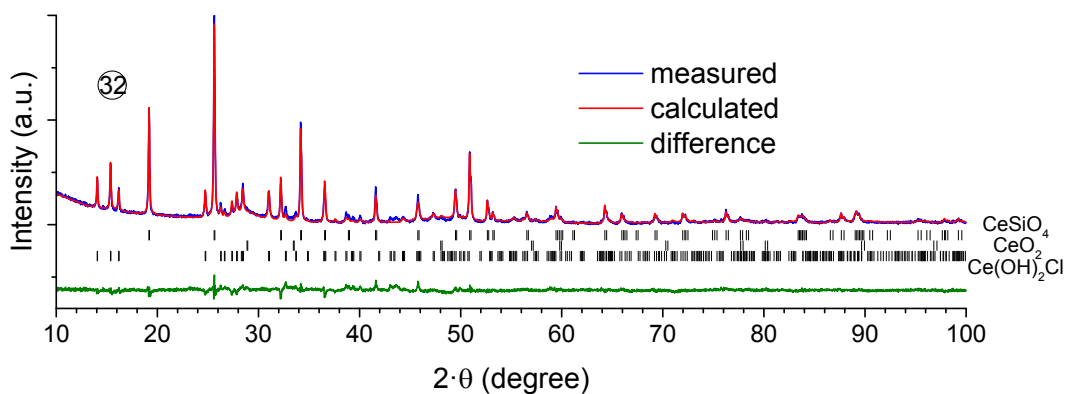

**Figure S6** PXRD profile, calculated and difference profile after Rietveld refinement obtained for a sample prepared under hydrothermal conditions ( $T = 150^\circ\text{C}$ ,  $t = 20$  days, Ar-atmosphere) in hydrochloric medium, with  $C_{\text{Ce(III)}} \approx C_{\text{Si}} \approx 0.21 \text{ mol}\cdot\text{L}^{-1}$  and  $\text{pH}_{\text{initial}} = 8.5$  (32). Unit cell parameters:  $\text{CeSiO}_4$ :  $a = 6.9480(1) \text{ \AA}$  and  $c = 6.1993(1) \text{ \AA}$ , i.e.  $V = 299.27(1) \text{ \AA}^3$ .  $\text{Ce(OH)}_2\text{Cl}$ :  $a = 6.2842(5) \text{ \AA}$ ,  $b = 3.9476(5) \text{ \AA}$ ,  $c = 6.8710(8) \text{ \AA}$  and  $\beta = 113.50(1)^\circ$ , i.e.  $V = 156,31(3) \text{ \AA}^3$ .

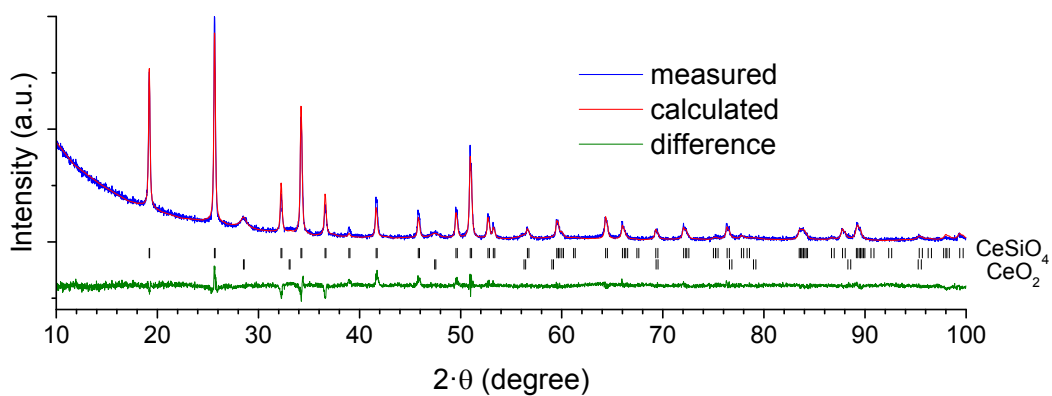

**Figure S7** PXRD profile, calculated and difference profile after Rietveld refinement obtained for a  $\text{CeSiO}_4$  sample prepared under hydrothermal conditions ( $T = 150^\circ\text{C}$ ,  $t = 20$  days, Ar-atmosphere), in nitric medium, with  $C_{\text{Ce(III)}} \approx C_{\text{Si}} \approx 1 \text{ mol}\cdot\text{L}^{-1}$  and  $\text{pH}_{\text{initial}} = 8.0$  then submitted to heating treatment at  $1000^\circ\text{C}$  under inert atmosphere (Ar). Unit cell parameters:

$\text{CeSiO}_4$ :  $a = 6.9446(1) \text{ \AA}$ ,  $c = 6.1975(2) \text{ \AA}$ ,  $V = 298.89(1) \text{ \AA}^3$ .

$\text{CeO}_2$ :  $a = 5.417(2) \text{ \AA}$ ,  $V = 159.0(1) \text{ \AA}^3$ .



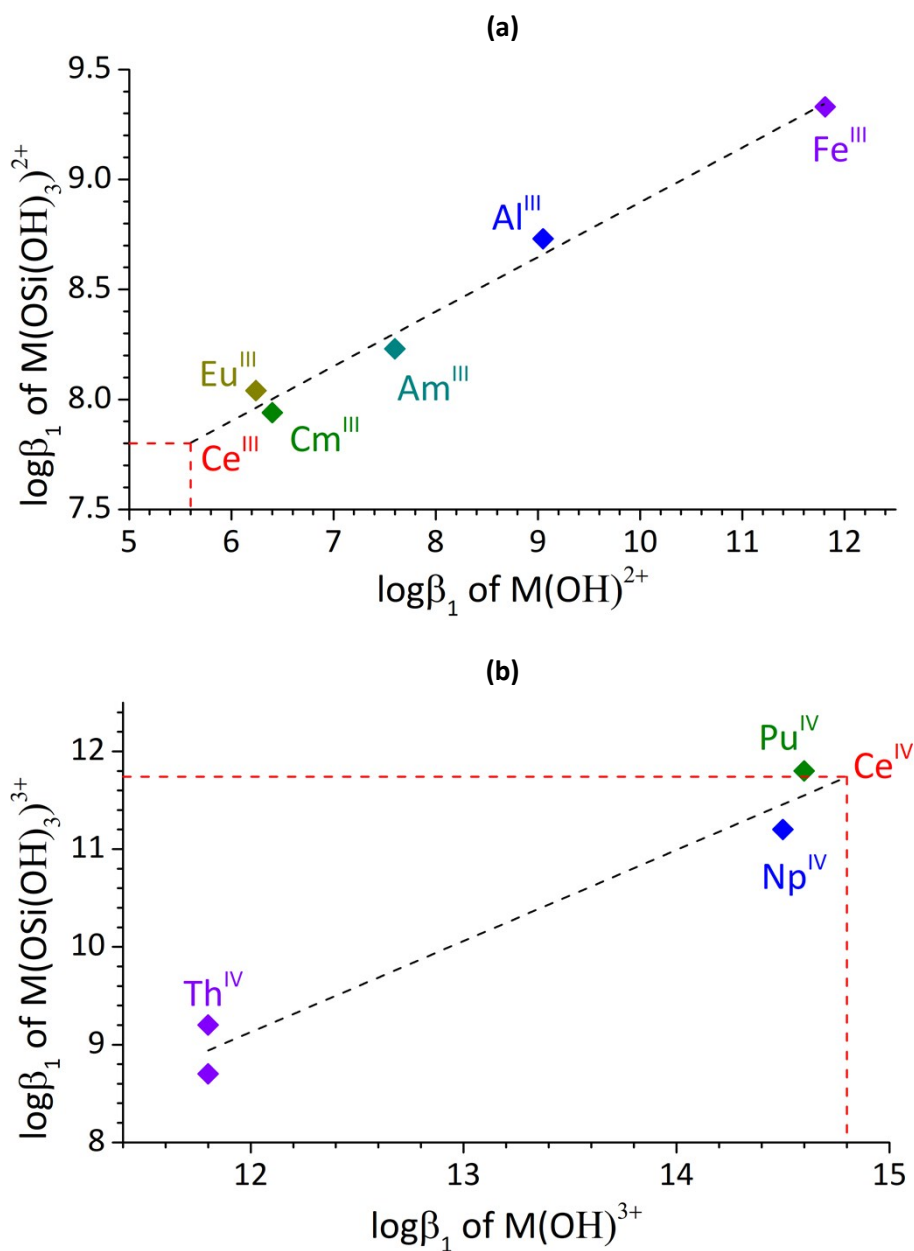

**Figure S8.** Comparison of the stability constants for the formation of metal-o-silicate and metal hydroxide complexes for M(III)- (a) and M(IV)-elements (b). Considered thermodynamics data available in **Table S4**.

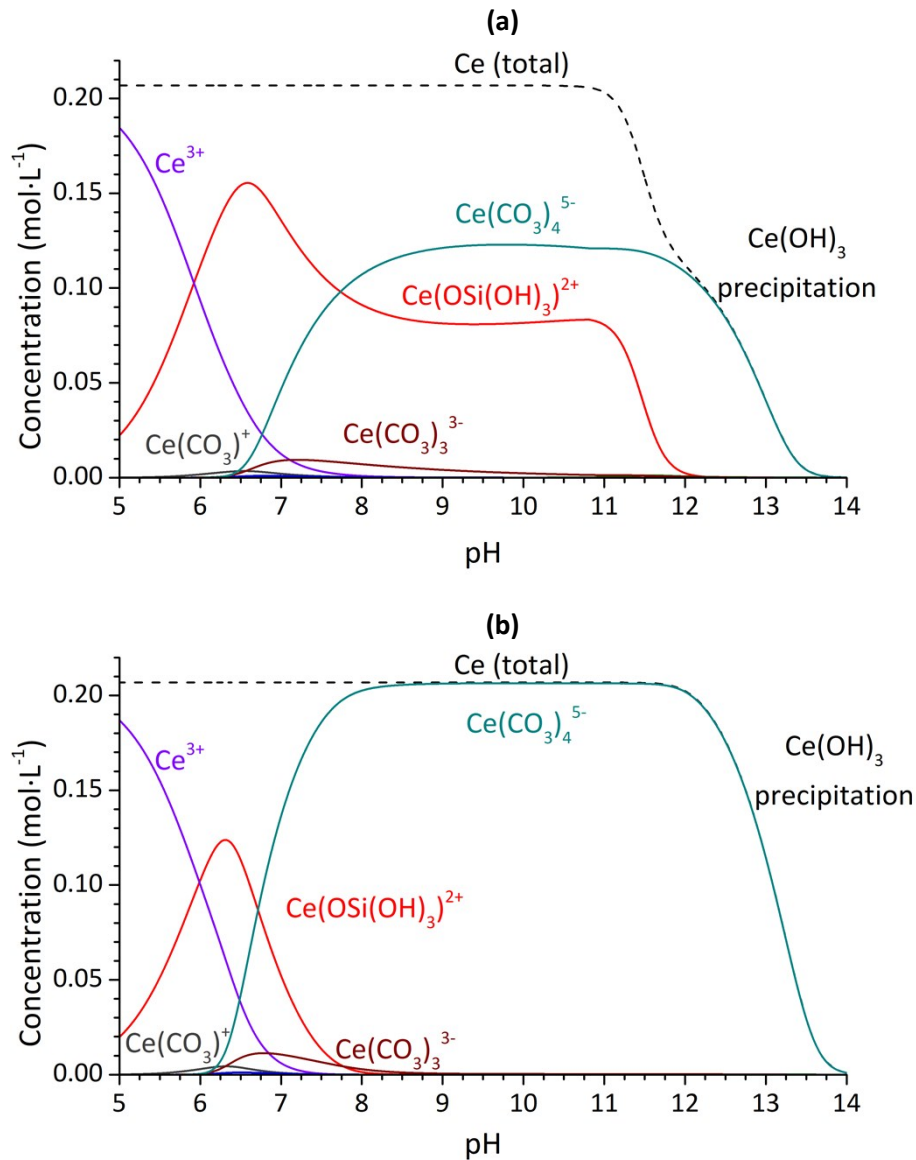

**Figure S9.** Cerium(III) speciation diagram of Ce(III) determined by PhreeqC calculation at room temperature with  $C_{\text{Si total}} \approx C_{\text{Ce total}} = 0.21 \text{ mol}\cdot\text{L}^{-1}$  and total carbonate concentration of  $0.5 \text{ mol L}^{-1}$  (a) and  $1.0 \text{ mol L}^{-1}$  (b). Considered thermodynamics data available in **Table S3**.

## **References:**

1. E. Giffaut, M. Grivé, P. Blanc, P. Vieillard, E. Colàs, H. Gailhanou, S. Gaboreau, N. Marty, B. Madé and L. Duro, *Applied Geochemistry*, 2014 **49**, 225-236.
2. S. A. Hayes, P. Yu, T. J. O'Keefe, M. J. O'Keefe and J. O. Stoffer, *Journal of The Electrochemical Society*, 2006, **149**, C623-C630.
3. D. Ferri, I. Grenthe and F. Salvatore, *Inorganic Chemistry*, 1983, **22**, 3162-3165.
4. J. M. S. Skakle, C. L. Dickson and F. P. Glasser, *Powder diffraction*, 2000, **15**, 234-238.
5. K. Spahiu and J. Bruno, *SKB*, 1995, **SKB Technical Report 95-35**.
6. P. Thakur, D. K. Singh and G. R. Choppin, *Inorganica Chimica Acta*, 2007, **360**, 3705-3711.
7. R. Guillaumont, T. Fanghänel, V. Neck, J. Fuger, D. A. Palmer, I. Grenthe and M. H. Rand, *Update on the chemical thermodynamics of uranium, neptunium, plutonium, americium and technetium*, Elsevier, Issy-les-Moulineaux, France, 2003.
8. M. P. Jensen, Ph.D. Thesis. Florida State University, 1994.
9. R. A. Porter and W. J. J. Weber, *Journal of Inorganic and Nuclear Chemistry*, 1971, **33**, 2443-2449.
10. V. Neck and J. I. Kim, *Radiochimica Acta*, 2001, **89**, 1-16.
11. A. B. Yusov, A. M. Fedosseev and C. H. Delegard, *Radiochimica Acta*, 2004, **92**, 869-881.
